# Supplementary material for: Comparison of factor analysis models applied to the NCANDA neuropsychological test battery
Source: PubMed Central journal article supplement (PMC8830737; doi:10.1371/journal.pone.0263174), 2022-02-10
Supplement: pone.0263174.s001.pdf [file pone.0263174.s001.pdf]

| Statistic                 | 8-Factor  | Gur+      | 8-Factor  | Gur       |
|---------------------------|-----------|-----------|-----------|-----------|
| Model Number              | 1         | 3         | 4         | 6         |
| LR Chi-square (saturated) | 255.903   | 277.88699 | 68.238998 | 80.481003 |
| df (saturated)            | 79        | 84        | 27        | 29        |
| P-value (saturated)       | 0         | 0         | 0         | 0         |
| LR Chi-square (baseline)  | 2401.0271 | 2402.051  | 830.72498 | 829.43799 |
| df (baseline)             | 120       | 120       | 45        | 45        |
| P-value (baseline)        | 0         | 0         | 0         | 0         |
| AIC                       | 28341.734 | 28361.533 | 18250.879 | 18253.654 |
| BIC                       | 28670.766 | 28668.031 | 18421.98  | 18415.754 |
| RMSEA                     | 0.058     | 0.059     | 0.048     | 0.051     |
| RMSEA 90% CI L.L.         | 0.05      | 0.051     | 0.034     | 0.038     |
| RMSEA 90% CI U.L.         | 0.066     | 0.066     | 0.062     | 0.065     |
| P(RMSEA<0.05)             | 0.062     | 0.038     | 0.572     | 0.407     |
| CFI                       | 0.922     | 0.915     | 0.948     | 0.934     |
| TLI                       | 0.882     | 0.879     | 0.913     | 0.898     |
