# Supplementary material for: Comparison of factor analysis models applied to the NCANDA neuropsychological test battery
Source: PubMed Central journal article supplement (PMC8830737; doi:10.1371/journal.pone.0263174), 2022-02-10
Supplement: pone.0263174.s002.pdf [file pone.0263174.s002.pdf]

## Alignment Optimization: Invariance Evaluation of the Gur+ CFA model (Model 3)

### Variables

cnp\_sf2b2\_crc : short Fractal 2-back: correct pos and neg (weighted)  
cnp\_cpw\_iwr\_d\_tot : Word Memory: CPW Total Correct  
cnp\_pvrt\_pvrctcr : Verbal Reasoning: Total Correct (verbal analogy/'logical reasoning')  
cnp\_pmat24a\_pmat24\_a\_cr : Matrix Reasoning: PMAT Total Correct (Special FORM A)  
cnp\_medf36\_medf36\_a : Emotion Differentiation: Total Correct  
cnp\_er40d\_er40\_cr : Emotion Recognition: ER40 Total Correct  
np\_wrat4\_mc\_raw : WRAT:math (mc)  
np\_wrat4\_wr\_raw : WRAT:Word (wr)  
cnp\_pvoc\_pvocr : Vocabulary: Total Correct  
np\_wais4\_rawscore : Raw Score for WAIS (digit symbol)  
np\_gpeg\_timec : Dexterity: Composite Time on Grooved Pedboard  
np\_atax\_sumc : Ataxia: sum of 4 sum scores  
cnp\_spcptnl\_scpt\_tp : Cont. Perform: Total True Positives (letter & num.)  
cnp\_pcet\_pcetcr : PECT Accuracy2 = (PCET\_CAT+1)\*PCETCR/(PCETCR+PCETER)  
meansvt : Mean of Visual Object Learning recall and delayed recall  
meanfc : Mean of Face rec and delayed rec

Note: Models were run in Mplus version 8.3.

### GUR+ Model: Invariance by Age Age (12: 12-16; 17: 17+)

#### APPROXIMATE MEASUREMENT INVARIANCE (NONINVARIANCE) FOR GROUPS

##### Intercepts/Thresholds

|          |      |      |
|----------|------|------|
| CNP_SF2B | 12   | 17   |
| CNP_CPW_ | 12   | 17   |
| CNP_PVRT | (12) | (17) |
| CNP_PMAT | 12   | 17   |
| CNP_MEDF | 12   | 17   |
| CNP_ER40 | 12   | 17   |
| NP_WRAT4 | (12) | (17) |
| NP_WRAT4 | (12) | (17) |
| CNP_PVOC | 12   | 17   |
| NP_WAIS4 | (12) | (17) |
| NP_GPEG_ | 12   | 17   |
| CNP_SPCP | (12) | (17) |
| CNP_PCET | (12) | (17) |
| MEANSVT  | 12   | 17   |
| MEANFC   | (12) | (17) |

##### Loadings for EXFUNC

|          |    |    |
|----------|----|----|
| CNP_SF2B | 12 | 17 |
| CNP_SPCP | 12 | 17 |
| CNP_PCET | 12 | 17 |

##### Loadings for EPISMEM

|          |    |    |
|----------|----|----|
| CNP_CPW_ | 12 | 17 |
| MEANSVT  | 12 | 17 |
| MEANFC   | 12 | 17 |

##### Loadings for CMPLXCOG

|          |    |    |
|----------|----|----|
| CNP_PVRT | 12 | 17 |
| CNP_PMAT | 12 | 17 |

##### Loadings for SOCCOG

|          |    |    |
|----------|----|----|
| CNP_MEDF | 12 | 17 |
| CNP_ER40 | 12 | 17 |

##### Loadings for GENAB

|          |      |      |
|----------|------|------|
| NP_WRAT4 | 12   | 17   |
| NP_WRAT4 | 12   | 17   |
| CNP_PVOC | (12) | (17) |

##### Loadings for MOTORSP

|          |    |    |
|----------|----|----|
| NP_WAIS4 | 12 | 17 |
|----------|----|----|

NP\_GPEG\_ 12 17

FACTOR MEAN COMPARISON AT THE 5% SIGNIFICANCE LEVEL IN DESCENDING ORDER

Results for Factor EXFUNC

| Ranking | Latent Class | Group Value | Factor Mean | Groups With Significantly Smaller Factor Mean |
|---------|--------------|-------------|-------------|-----------------------------------------------|
| 1       | 1            | 12          | 0.000       |                                               |
| 2       | 2            | 17          | -0.021      |                                               |

Results for Factor EPISMEM

| Ranking | Latent Class | Group Value | Factor Mean | Groups With Significantly Smaller Factor Mean |
|---------|--------------|-------------|-------------|-----------------------------------------------|
| 1       | 1            | 12          | 0.000       | 17                                            |
| 2       | 2            | 17          | -0.177      |                                               |

Results for Factor CmplXCOG

| Ranking | Latent Class | Group Value | Factor Mean | Groups With Significantly Smaller Factor Mean |
|---------|--------------|-------------|-------------|-----------------------------------------------|
| 1       | 2            | 17          | 0.122       |                                               |
| 2       | 1            | 12          | 0.000       |                                               |

Results for Factor SOCCOG

| Ranking | Latent Class | Group Value | Factor Mean | Groups With Significantly Smaller Factor Mean |
|---------|--------------|-------------|-------------|-----------------------------------------------|
| 1       | 2            | 17          | 0.203       |                                               |
| 2       | 1            | 12          | 0.000       |                                               |

Results for Factor GENAB

| Ranking | Latent Class | Group Value | Factor Mean | Groups With Significantly Smaller Factor Mean |
|---------|--------------|-------------|-------------|-----------------------------------------------|
| 1       | 2            | 17          | 0.355       | 12                                            |
| 2       | 1            | 12          | 0.000       |                                               |

Results for Factor MOTORSP

| Ranking | Latent Class | Group Value | Factor Mean | Groups With Significantly Smaller Factor Mean |
|---------|--------------|-------------|-------------|-----------------------------------------------|
| 1       | 1            | 12          | 0.000       |                                               |
| 2       | 2            | 17          | -0.051      |                                               |

ALIGNMENT OUTPUT

INVARIANCE ANALYSIS

Intercepts/Thresholds

Intercept for CNP\_SF2B

| Group | Group | Value  | Value | Difference | SE    | P-value |
|-------|-------|--------|-------|------------|-------|---------|
| 17    | 12    | -0.116 | 0.043 | -0.159     | 0.088 | 0.070   |

Approximate Measurement Invariance Holds For Groups:

12 17

Weighted Average Value Across Invariant Groups: -0.029

R-square/Explained variance/Invariance index: 0.150

Invariant Group Values, Difference to Average and Significance

| Group | Value  | Difference | SE    | P-value |
|-------|--------|------------|-------|---------|
| 12    | 0.043  | 0.071      | 0.039 | 0.070   |
| 17    | -0.116 | -0.088     | 0.048 | 0.070   |

Intercept for CNP\_CPW\_

| Group | Group | Value | Value | Difference | SE    | P-value |
|-------|-------|-------|-------|------------|-------|---------|
| 17    | 12    | 0.227 | 0.239 | -0.012     | 0.048 | 0.798   |

Approximate Measurement Invariance Holds For Groups:

12 17

Weighted Average Value Across Invariant Groups: 0.234

R-square/Explained variance/Invariance index: 0.997

Invariant Group Values, Difference to Average and Significance

| Group | Value | Difference | SE    | P-value |
|-------|-------|------------|-------|---------|
| 12    | 0.239 | 0.005      | 0.021 | 0.798   |
| 17    | 0.227 | -0.007     | 0.026 | 0.798   |

Intercept for CNP\_PVRT

| Group | Group | Value | Value | Difference | SE | P-value |
|-------|-------|-------|-------|------------|----|---------|
|-------|-------|-------|-------|------------|----|---------|

Approximate Invariance Was Not Found For This Parameter.

Intercept for CNP\_PMAT

| Group | Group | Value  | Value  | Difference | SE    | P-value |
|-------|-------|--------|--------|------------|-------|---------|
| 17    | 12    | -0.077 | -0.130 | 0.053      | 0.017 | 0.002   |

Approximate Measurement Invariance Holds For Groups:

12 17

Weighted Average Value Across Invariant Groups: -0.106

R-square/Explained variance/Invariance index: 0.823

Invariant Group Values, Difference to Average and Significance

| Group | Value  | Difference | SE    | P-value |
|-------|--------|------------|-------|---------|
| 12    | -0.130 | -0.024     | 0.008 | 0.002   |
| 17    | -0.077 | 0.029      | 0.009 | 0.002   |

Intercept for CNP\_MEDF

| Group | Group | Value  | Value  | Difference | SE    | P-value |
|-------|-------|--------|--------|------------|-------|---------|
| 17    | 12    | -0.026 | -0.003 | -0.023     | 0.013 | 0.081   |

Approximate Measurement Invariance Holds For Groups:

12 17

Weighted Average Value Across Invariant Groups: -0.013

R-square/Explained variance/Invariance index: 0.884

Invariant Group Values, Difference to Average and Significance

| Group | Value  | Difference | SE    | P-value |
|-------|--------|------------|-------|---------|
| 12    | -0.003 | 0.010      | 0.006 | 0.081   |
| 17    | -0.026 | -0.013     | 0.007 | 0.081   |

Intercept for CNP\_ER40

| Group | Group | Value  | Value  | Difference | SE    | P-value |
|-------|-------|--------|--------|------------|-------|---------|
| 17    | 12    | -0.235 | -0.268 | 0.033      | 0.086 | 0.699   |

Approximate Measurement Invariance Holds For Groups:

12 17

Weighted Average Value Across Invariant Groups: -0.253

R-square/Explained variance/Invariance index: 0.907

Invariant Group Values, Difference to Average and Significance

| Group | Value  | Difference | SE    | P-value |
|-------|--------|------------|-------|---------|
| 12    | -0.268 | -0.015     | 0.039 | 0.699   |
| 17    | -0.235 | 0.018      | 0.048 | 0.699   |

Intercept for NP\_WRAT4

| Group | Group | Value | Value | Difference | SE | P-value |
|-------|-------|-------|-------|------------|----|---------|
|-------|-------|-------|-------|------------|----|---------|

Approximate Invariance Was Not Found For This Parameter.

Intercept for NP\_WRAT4

| Group | Group | Value  | Value  | Difference | SE    | P-value |
|-------|-------|--------|--------|------------|-------|---------|
| 17    | 12    | -0.225 | -0.201 | -0.024     | 0.005 | 0.000   |

Approximate Invariance Was Not Found For This Parameter.

Intercept for CNP\_PVOC

| Group | Group | Value  | Value  | Difference | SE    | P-value |
|-------|-------|--------|--------|------------|-------|---------|
| 17    | 12    | -0.177 | -0.266 | 0.089      | 0.072 | 0.213   |

Approximate Measurement Invariance Holds For Groups:

12 17

Weighted Average Value Across Invariant Groups: -0.226

R-square/Explained variance/Invariance index: 0.885

Invariant Group Values, Difference to Average and Significance

| Group | Value  | Difference | SE    | P-value |
|-------|--------|------------|-------|---------|
| 12    | -0.266 | -0.040     | 0.032 | 0.213   |
| 17    | -0.177 | 0.049      | 0.040 | 0.213   |

Intercept for NP\_WAIS4

| Group | Group | Value | Value | Difference | SE | P-value |
|-------|-------|-------|-------|------------|----|---------|
|-------|-------|-------|-------|------------|----|---------|

Approximate Invariance Was Not Found For This Parameter.

Intercept for NP\_GPEG\_

| Group | Group | Value | Value | Difference | SE    | P-value |
|-------|-------|-------|-------|------------|-------|---------|
| 17    | 12    | 0.179 | 0.289 | -0.110     | 0.105 | 0.293   |

Approximate Measurement Invariance Holds For Groups:

12 17

Weighted Average Value Across Invariant Groups: 0.240

R-square/Explained variance/Invariance index: 0.428

Invariant Group Values, Difference to Average and Significance

| Group | Value | Difference | SE    | P-value |
|-------|-------|------------|-------|---------|
| 12    | 0.289 | 0.049      | 0.047 | 0.293   |
| 17    | 0.179 | -0.061     | 0.058 | 0.293   |

Intercept for CNP\_SPCP

| Group | Group | Value | Value  | Difference | SE    | P-value |
|-------|-------|-------|--------|------------|-------|---------|
| 17    | 12    | 0.016 | -0.357 | 0.373      | 0.089 | 0.000   |

Approximate Invariance Was Not Found For This Parameter.

Intercept for CNP\_PCET

| Group | Group | Value | Value | Difference | SE    | P-value |
|-------|-------|-------|-------|------------|-------|---------|
| 17    | 12    | 0.089 | 0.111 | -0.022     | 0.053 | 0.683   |

Approximate Invariance Was Not Found For This Parameter.

Intercept for MEANSVT

| Group | Group | Value | Value | Difference | SE    | P-value |
|-------|-------|-------|-------|------------|-------|---------|
| 17    | 12    | 0.089 | 0.111 | -0.022     | 0.053 | 0.683   |

Approximate Measurement Invariance Holds For Groups:

12 17

Weighted Average Value Across Invariant Groups: 0.101

R-square/Explained variance/Invariance index: 0.937

Invariant Group Values, Difference to Average and Significance

| Group | Value | Difference | SE    | P-value |
|-------|-------|------------|-------|---------|
| 12    | 0.111 | 0.010      | 0.024 | 0.683   |
| 17    | 0.089 | -0.012     | 0.029 | 0.683   |

Intercept for MEANFC

| Group | Group | Value | Value | Difference | SE    | P-value |
|-------|-------|-------|-------|------------|-------|---------|
| 17    | 12    | 0.638 | 0.649 | -0.011     | 0.019 | 0.567   |

Approximate Invariance Was Not Found For This Parameter.

Loadings for CNP\_SF2B

| Group | Group | Value | Value | Difference | SE    | P-value |
|-------|-------|-------|-------|------------|-------|---------|
| 17    | 12    | 0.638 | 0.649 | -0.011     | 0.019 | 0.567   |

Approximate Measurement Invariance Holds For Groups:

12 17

Weighted Average Value Across Invariant Groups: 0.644

R-square/Explained variance/Invariance index: 0.998

Invariant Group Values, Difference to Average and Significance

| Group | Value | Difference | SE    | P-value |
|-------|-------|------------|-------|---------|
| 12    | 0.649 | 0.005      | 0.009 | 0.567   |
| 17    | 0.638 | -0.006     | 0.011 | 0.567   |

Loadings for CNP\_SPCP

| Group | Group | Value | Value | Difference | SE    | P-value |
|-------|-------|-------|-------|------------|-------|---------|
| 17    | 12    | 0.402 | 0.631 | -0.228     | 0.128 | 0.074   |

Approximate Measurement Invariance Holds For Groups:

12 17

Weighted Average Value Across Invariant Groups: 0.528

R-square/Explained variance/Invariance index: 0.733

Invariant Group Values, Difference to Average and Significance

| Group | Value | Difference | SE    | P-value |
|-------|-------|------------|-------|---------|
| 12    | 0.631 | 0.103      | 0.057 | 0.074   |
| 17    | 0.402 | -0.126     | 0.071 | 0.074   |

Loadings for CNP\_PCET

| Group | Group | Value | Value | Difference | SE    | P-value |
|-------|-------|-------|-------|------------|-------|---------|
| 17    | 12    | 0.594 | 0.531 | 0.063      | 0.143 | 0.659   |

Approximate Measurement Invariance Holds For Groups:

12 17

Weighted Average Value Across Invariant Groups: 0.559

R-square/Explained variance/Invariance index: 0.860

Invariant Group Values, Difference to Average and Significance

| Group | Value | Difference | SE    | P-value |
|-------|-------|------------|-------|---------|
| 12    | 0.531 | -0.028     | 0.064 | 0.659   |
| 17    | 0.594 | 0.035      | 0.079 | 0.659   |

Loadings for CNP\_CPW\_

| Group | Group | Value | Value | Difference | SE    | P-value |
|-------|-------|-------|-------|------------|-------|---------|
| 17    | 12    | 0.535 | 0.604 | -0.069     | 0.110 | 0.531   |

Approximate Measurement Invariance Holds For Groups:

12 17

Weighted Average Value Across Invariant Groups: 0.573

R-square/Explained variance/Invariance index: 0.883

Invariant Group Values, Difference to Average and Significance

| Group | Value | Difference | SE    | P-value |
|-------|-------|------------|-------|---------|
| 12    | 0.604 | 0.031      | 0.049 | 0.531   |

17 0.535 -0.038 0.061 0.531

Loadings for MEANSVT

| Group | Group | Value | Value | Difference | SE    | P-value |
|-------|-------|-------|-------|------------|-------|---------|
| 17    | 12    | 0.786 | 0.577 | 0.208      | 0.140 | 0.137   |

Approximate Measurement Invariance Holds For Groups:  
12 17

Weighted Average Value Across Invariant Groups: 0.671

R-square/Explained variance/Invariance index: 0.000

Invariant Group Values, Difference to Average and Significance

| Group | Value | Difference | SE    | P-value |
|-------|-------|------------|-------|---------|
| 12    | 0.577 | -0.093     | 0.063 | 0.137   |
| 17    | 0.786 | 0.115      | 0.077 | 0.137   |

Loadings for MEANFC

| Group | Group | Value | Value | Difference | SE    | P-value |
|-------|-------|-------|-------|------------|-------|---------|
| 17    | 12    | 0.697 | 0.692 | 0.005      | 0.010 | 0.597   |

Approximate Measurement Invariance Holds For Groups:  
12 17

Weighted Average Value Across Invariant Groups: 0.695

R-square/Explained variance/Invariance index: 0.999

Invariant Group Values, Difference to Average and Significance

| Group | Value | Difference | SE    | P-value |
|-------|-------|------------|-------|---------|
| 12    | 0.692 | -0.002     | 0.004 | 0.597   |
| 17    | 0.697 | 0.003      | 0.005 | 0.597   |

Loadings for CNP\_PVRT

| Group | Group | Value | Value | Difference | SE    | P-value |
|-------|-------|-------|-------|------------|-------|---------|
| 17    | 12    | 0.773 | 0.829 | -0.055     | 0.055 | 0.316   |

Approximate Measurement Invariance Holds For Groups:  
12 17

Weighted Average Value Across Invariant Groups: 0.804

R-square/Explained variance/Invariance index: 0.828

Invariant Group Values, Difference to Average and Significance

| Group | Value | Difference | SE    | P-value |
|-------|-------|------------|-------|---------|
| 12    | 0.829 | 0.025      | 0.025 | 0.316   |
| 17    | 0.773 | -0.030     | 0.030 | 0.316   |

Loadings for CNP\_PMAT

| Group | Group | Value | Value | Difference | SE    | P-value |
|-------|-------|-------|-------|------------|-------|---------|
| 17    | 12    | 0.655 | 0.612 | 0.043      | 0.042 | 0.308   |

Approximate Measurement Invariance Holds For Groups:  
12 17

Weighted Average Value Across Invariant Groups: 0.631

R-square/Explained variance/Invariance index: 0.000

Invariant Group Values, Difference to Average and Significance

| Group | Value | Difference | SE    | P-value |
|-------|-------|------------|-------|---------|
| 12    | 0.612 | -0.019     | 0.019 | 0.308   |
| 17    | 0.655 | 0.024      | 0.023 | 0.308   |

Loadings for CNP\_MEDF

| Group | Group | Value | Value | Difference | SE    | P-value |
|-------|-------|-------|-------|------------|-------|---------|
| 17    | 12    | 0.416 | 0.395 | 0.021      | 0.017 | 0.206   |

Approximate Measurement Invariance Holds For Groups:  
12 17

Weighted Average Value Across Invariant Groups: 0.404

R-square/Explained variance/Invariance index: 0.681

Invariant Group Values, Difference to Average and Significance

| Group | Value | Difference | SE    | P-value |
|-------|-------|------------|-------|---------|
| 12    | 0.395 | -0.009     | 0.008 | 0.206   |
| 17    | 0.416 | 0.012      | 0.009 | 0.206   |

Loadings for CNP\_ER40

| Group | Group | Value | Value | Difference | SE    | P-value |
|-------|-------|-------|-------|------------|-------|---------|
| 17    | 12    | 0.179 | 0.299 | -0.120     | 0.102 | 0.241   |

Approximate Measurement Invariance Holds For Groups:  
12 17

Weighted Average Value Across Invariant Groups: 0.245

R-square/Explained variance/Invariance index: 0.000

Invariant Group Values, Difference to Average and Significance

| Group | Value | Difference | SE    | P-value |
|-------|-------|------------|-------|---------|
| 12    | 0.299 | 0.054      | 0.046 | 0.241   |
| 17    | 0.179 | -0.066     | 0.056 | 0.241   |

Loadings for NP\_WRAT4

| Group | Group | Value | Value | Difference | SE    | P-value |
|-------|-------|-------|-------|------------|-------|---------|
| 17    | 12    | 0.769 | 0.770 | -0.001     | 0.027 | 0.981   |

Approximate Measurement Invariance Holds For Groups:

12 17

Weighted Average Value Across Invariant Groups: 0.769

R-square/Explained variance/Invariance index: 1.000

Invariant Group Values, Difference to Average and Significance

| Group | Value | Difference | SE    | P-value |
|-------|-------|------------|-------|---------|
| 12    | 0.770 | 0.000      | 0.012 | 0.981   |
| 17    | 0.769 | 0.000      | 0.015 | 0.981   |

Loadings for NP\_WRAT4

| Group | Group | Value | Value | Difference | SE    | P-value |
|-------|-------|-------|-------|------------|-------|---------|
| 17    | 12    | 0.868 | 0.924 | -0.056     | 0.072 | 0.442   |

Approximate Measurement Invariance Holds For Groups:

12 17

Weighted Average Value Across Invariant Groups: 0.899

R-square/Explained variance/Invariance index: 0.938

Invariant Group Values, Difference to Average and Significance

| Group | Value | Difference | SE    | P-value |
|-------|-------|------------|-------|---------|
| 12    | 0.924 | 0.025      | 0.032 | 0.442   |
| 17    | 0.868 | -0.031     | 0.040 | 0.442   |

Loadings for CNP\_PVOC

| Group | Group | Value | Value | Difference | SE    | P-value |
|-------|-------|-------|-------|------------|-------|---------|
| 17    | 12    | 0.942 | 0.637 | 0.305      | 0.092 | 0.001   |

Approximate Invariance Was Not Found For This Parameter.

Loadings for NP\_WAIS4

| Group | Group | Value  | Value  | Difference | SE    | P-value |
|-------|-------|--------|--------|------------|-------|---------|
| 17    | 12    | -1.074 | -0.967 | -0.106     | 0.061 | 0.082   |

Approximate Measurement Invariance Holds For Groups:

12 17

Weighted Average Value Across Invariant Groups: -1.015

R-square/Explained variance/Invariance index: 0.943

Invariant Group Values, Difference to Average and Significance

| Group | Value  | Difference | SE    | P-value |
|-------|--------|------------|-------|---------|
| 12    | -0.967 | 0.048      | 0.027 | 0.082   |
| 17    | -1.074 | -0.059     | 0.034 | 0.082   |

Loadings for NP\_GPEG\_

| Group | Group | Value | Value | Difference | SE    | P-value |
|-------|-------|-------|-------|------------|-------|---------|
| 17    | 12    | 0.641 | 0.731 | -0.090     | 0.301 | 0.766   |

Approximate Measurement Invariance Holds For Groups:

12 17

Weighted Average Value Across Invariant Groups: 0.691

R-square/Explained variance/Invariance index: 0.962

Invariant Group Values, Difference to Average and Significance

| Group | Value | Difference | SE    | P-value |
|-------|-------|------------|-------|---------|
| 12    | 0.731 | 0.040      | 0.135 | 0.766   |
| 17    | 0.641 | -0.049     | 0.166 | 0.766   |

Average Invariance index: 0.720

**GUR+ Model: Invariance by Time  
Time (0: Baseline; 1: Year 1; 2: Year 2; 3: Year 3)**

APPROXIMATE MEASUREMENT INVARIANCE (NONINVARIANCE) FOR GROUPS

Intercepts/Thresholds

|          |   |   |     |     |
|----------|---|---|-----|-----|
| CNP_SF2B | 0 | 1 | 2   | 3   |
| CNP_CPW_ | 0 | 1 | (2) | (3) |

CNP\_PVRT (0) (1) (2) (3)  
 CNP\_PMAT 0 1 2 3  
 CNP\_MEDF 0 1 2 3  
 CNP\_ER40 (0) 1 2 3  
 NP\_WRAT4 (0) (1) (2) (3)  
 NP\_WRAT4 0 1 2 3  
 CNP\_PVOC 0 1 2 3  
 NP\_WAIS4 (0) (1) (2) (3)  
 NP\_GPEG\_ (0) (1) 2 3  
 CNP\_SPCP\_ 0 1 (2) (3)  
 CNP\_PCET (0) (1) (2) (3)  
 MEANSVT 0 1 2 3  
 MEANFC (0) (1) (2) (3)

Loadings for EXFUNC

CNP\_SF2B 0 1 2 3  
 CNP\_SPCP (0) 1 2 3  
 CNP\_PCET 0 1 2 3

Loadings for EPISMEM

CNP\_CPW\_ 0 1 2 3  
 MEANSVT 0 1 2 3  
 MEANFC 0 1 2 3

Loadings for CMPLXCOG

CNP\_PVRT 0 1 2 3  
 CNP\_PMAT 0 1 2 3

Loadings for SOCCOG

CNP\_MEDF 0 1 2 3  
 CNP\_ER40 0 1 2 3

Loadings for GENAB

NP\_WRAT4 0 1 2 3  
 NP\_WRAT4 0 1 2 3  
 CNP\_PVOC 0 1 2 3

Loadings for MOTORSP

NP\_WAIS4 (0) 1 2 3  
 NP\_GPEG\_ (0) 1 2 3

FACTOR MEAN COMPARISON AT THE 5% SIGNIFICANCE LEVEL IN DESCENDING ORDER

Results for Factor EXFUNC

| Ranking | Latent Class | Group Value | Factor Mean | Groups With Significantly Smaller Factor Mean |
|---------|--------------|-------------|-------------|-----------------------------------------------|
| 1       | 2            | 1           | 0.137       |                                               |
| 2       | 4            | 3           | 0.112       |                                               |
| 3       | 3            | 2           | 0.092       |                                               |
| 4       | 1            | 0           | 0.000       |                                               |

Results for Factor EPISMEM

| Ranking | Latent Class | Group Value | Factor Mean | Groups With Significantly Smaller Factor Mean |
|---------|--------------|-------------|-------------|-----------------------------------------------|
| 1       | 1            | 0           | 0.000       | 3                                             |
| 2       | 2            | 1           | -0.040      | 3                                             |
| 3       | 3            | 2           | -0.076      |                                               |
| 4       | 4            | 3           | -0.184      |                                               |

Results for Factor CMPLXCOG

| Ranking | Latent Class | Group Value | Factor Mean | Groups With Significantly Smaller Factor Mean |
|---------|--------------|-------------|-------------|-----------------------------------------------|
| 1       | 4            | 3           | 0.101       | 0                                             |
| 2       | 3            | 2           | 0.048       |                                               |
| 3       | 2            | 1           | 0.029       |                                               |
| 4       | 1            | 0           | 0.000       |                                               |

Results for Factor SOCCOG

| Ranking | Latent Class | Group Value | Factor Mean | Groups With Significantly Smaller Factor Mean |
|---------|--------------|-------------|-------------|-----------------------------------------------|
| 1       | 1            | 0           | 0.000       |                                               |
| 2       | 3            | 2           | -0.071      |                                               |
| 3       | 2            | 1           | -0.119      |                                               |
| 4       | 4            | 3           | -0.194      |                                               |

Results for Factor GENAB

| Ranking | Latent Class | Group Value | Factor Mean | Groups With Significantly Smaller Factor Mean |
|---------|--------------|-------------|-------------|-----------------------------------------------|
| 1       | 4            | 3           | 0.124       | 1 0                                           |
| 2       | 3            | 2           | 0.070       | 0                                             |
| 3       | 2            | 1           | 0.007       |                                               |
| 4       | 1            | 0           | 0.000       |                                               |

Results for Factor MOTORSP

| Ranking | Latent Class | Group Value | Factor Mean | Groups With Significantly Smaller Factor Mean |
|---------|--------------|-------------|-------------|-----------------------------------------------|
| 1       | 4            | 3           | 0.021       | 1 0                                           |
| 2       | 3            | 2           | 0.011       | 1 0                                           |
| 3       | 2            | 1           | 0.003       |                                               |
| 4       | 1            | 0           | 0.000       |                                               |

ALIGNMENT OUTPUT

INVARIANCE ANALYSIS

Intercepts/Thresholds

Intercept for CNP\_SF2B

| Group | Group | Value  | Value  | Difference | SE    | P-value |
|-------|-------|--------|--------|------------|-------|---------|
| 1     | 0     | -0.004 | -0.076 | 0.072      | 0.071 | 0.310   |
| 2     | 0     | -0.063 | -0.076 | 0.013      | 0.022 | 0.560   |
| 2     | 1     | -0.063 | -0.004 | -0.059     | 0.060 | 0.328   |
| 3     | 0     | -0.005 | -0.076 | 0.071      | 0.073 | 0.329   |
| 3     | 1     | -0.005 | -0.004 | -0.001     | 0.029 | 0.970   |
| 3     | 2     | -0.005 | -0.063 | 0.058      | 0.059 | 0.322   |

Approximate Measurement Invariance Holds For Groups:

0 1 2 3

Weighted Average Value Across Invariant Groups: -0.039

R-square/Explained variance/Invariance index: 0.659

Invariant Group Values, Difference to Average and Significance

| Group | Value  | Difference | SE    | P-value |
|-------|--------|------------|-------|---------|
| 0     | -0.076 | -0.037     | 0.037 | 0.319   |
| 1     | -0.004 | 0.035      | 0.036 | 0.334   |
| 2     | -0.063 | -0.024     | 0.025 | 0.341   |
| 3     | -0.005 | 0.034      | 0.037 | 0.358   |

Intercept for CNP\_CPW\_

| Group | Group | Value | Value | Difference | SE    | P-value |
|-------|-------|-------|-------|------------|-------|---------|
| 1     | 0     | 0.047 | 0.164 | -0.117     | 0.053 | 0.026   |



|   |   |        |        |        |       |       |
|---|---|--------|--------|--------|-------|-------|
| 2 | 0 | -0.083 | 0.164  | -0.247 | 0.053 | 0.000 |
| 2 | 1 | -0.083 | 0.047  | -0.129 | 0.049 | 0.008 |
| 3 | 0 | -0.105 | 0.164  | -0.269 | 0.056 | 0.000 |
| 3 | 1 | -0.105 | 0.047  | -0.152 | 0.052 | 0.004 |
| 3 | 2 | -0.105 | -0.083 | -0.023 | 0.043 | 0.595 |

Approximate Measurement Invariance Holds For Groups:

0 1

Weighted Average Value Across Invariant Groups: 0.108

R-square/Explained variance/Invariance index: 0.404

Invariant Group Values, Difference to Average and Significance

| Group | Value | Difference | SE    | P-value |
|-------|-------|------------|-------|---------|
| 0     | 0.164 | 0.056      | 0.025 | 0.026   |
| 1     | 0.047 | -0.061     | 0.028 | 0.026   |

Intercept for CNP\_PVRT

| Group | Group | Value | Value | Difference | SE | P-value |
|-------|-------|-------|-------|------------|----|---------|
|-------|-------|-------|-------|------------|----|---------|

Approximate Measurement Invariance Holds For Groups:

Weighted Average Value Across Invariant Groups: NaN

R-square/Explained variance/Invariance index: 0.000

Invariant Group Values, Difference to Average and Significance

| Group | Value | Difference | SE | P-value |
|-------|-------|------------|----|---------|
|-------|-------|------------|----|---------|

Intercept for CNP\_PMAT

| Group | Group | Value  | Value  | Difference | SE    | P-value |
|-------|-------|--------|--------|------------|-------|---------|
| 1     | 0     | -0.039 | -0.055 | 0.016      | 0.022 | 0.476   |
| 2     | 0     | -0.028 | -0.055 | 0.027      | 0.022 | 0.215   |
| 2     | 1     | -0.028 | -0.039 | 0.011      | 0.022 | 0.601   |
| 3     | 0     | -0.002 | -0.055 | 0.053      | 0.021 | 0.013   |
| 3     | 1     | -0.002 | -0.039 | 0.038      | 0.022 | 0.082   |
| 3     | 2     | -0.002 | -0.028 | 0.026      | 0.022 | 0.236   |

Approximate Measurement Invariance Holds For Groups:

0 1 2 3

Weighted Average Value Across Invariant Groups: -0.033

R-square/Explained variance/Invariance index: 0.785

Invariant Group Values, Difference to Average and Significance

| Group | Value  | Difference | SE    | P-value |
|-------|--------|------------|-------|---------|
| 0     | -0.055 | -0.022     | 0.013 | 0.082   |
| 1     | -0.039 | -0.006     | 0.013 | 0.626   |
| 2     | -0.028 | 0.005      | 0.014 | 0.714   |
| 3     | -0.002 | 0.031      | 0.014 | 0.024   |

Intercept for CNP\_MEDF

| Group | Group | Value | Value | Difference | SE    | P-value |
|-------|-------|-------|-------|------------|-------|---------|
| 1     | 0     | 0.034 | 0.045 | -0.011     | 0.007 | 0.106   |
| 2     | 0     | 0.024 | 0.045 | -0.021     | 0.005 | 0.000   |
| 2     | 1     | 0.024 | 0.034 | -0.011     | 0.005 | 0.046   |
| 3     | 0     | 0.001 | 0.045 | -0.044     | 0.025 | 0.083   |
| 3     | 1     | 0.001 | 0.034 | -0.033     | 0.021 | 0.111   |
| 3     | 2     | 0.001 | 0.024 | -0.023     | 0.023 | 0.333   |

Approximate Measurement Invariance Holds For Groups:

0 1 2 3

Weighted Average Value Across Invariant Groups: 0.028

R-square/Explained variance/Invariance index: 0.888

Invariant Group Values, Difference to Average and Significance

| Group | Value | Difference | SE    | P-value |
|-------|-------|------------|-------|---------|
| 0     | 0.045 | 0.017      | 0.008 | 0.021   |
| 1     | 0.034 | 0.007      | 0.004 | 0.074   |
| 2     | 0.024 | -0.004     | 0.006 | 0.509   |

3 0.001 -0.027 0.018 0.143

Intercept for CNP\_ER40

| Group | Group | Value | Value  | Difference | SE    | P-value |
|-------|-------|-------|--------|------------|-------|---------|
| 1     | 0     | 0.009 | -0.233 | 0.242      | 0.064 | 0.000   |
| 2     | 0     | 0.169 | -0.233 | 0.402      | 0.057 | 0.000   |
| 2     | 1     | 0.169 | 0.009  | 0.160      | 0.056 | 0.004   |
| 3     | 0     | 0.190 | -0.233 | 0.423      | 0.059 | 0.000   |
| 3     | 1     | 0.190 | 0.009  | 0.181      | 0.056 | 0.001   |
| 3     | 2     | 0.190 | 0.169  | 0.021      | 0.039 | 0.587   |

Approximate Measurement Invariance Holds For Groups:

1 2 3

Weighted Average Value Across Invariant Groups: 0.117

R-square/Explained variance/Invariance index: 0.000

Invariant Group Values, Difference to Average and Significance

| Group | Value | Difference | SE    | P-value |
|-------|-------|------------|-------|---------|
| 1     | 0.009 | -0.108     | 0.033 | 0.001   |
| 2     | 0.169 | 0.052      | 0.027 | 0.053   |
| 3     | 0.190 | 0.073      | 0.028 | 0.009   |

Intercept for NP\_WRAT4

| Group | Group | Value | Value | Difference | SE | P-value |
|-------|-------|-------|-------|------------|----|---------|
|-------|-------|-------|-------|------------|----|---------|

Approximate Measurement Invariance Holds For Groups:

Weighted Average Value Across Invariant Groups: NaN

R-square/Explained variance/Invariance index: 0.000

Invariant Group Values, Difference to Average and Significance

| Group | Value | Difference | SE | P-value |
|-------|-------|------------|----|---------|
|-------|-------|------------|----|---------|

Intercept for NP\_WRAT4

| Group | Group | Value  | Value  | Difference | SE    | P-value |
|-------|-------|--------|--------|------------|-------|---------|
| 1     | 0     | -0.046 | -0.069 | 0.024      | 0.030 | 0.430   |
| 2     | 0     | 0.011  | -0.069 | 0.080      | 0.034 | 0.020   |
| 2     | 1     | 0.011  | -0.046 | 0.056      | 0.032 | 0.078   |
| 3     | 0     | 0.059  | -0.069 | 0.128      | 0.040 | 0.001   |
| 3     | 1     | 0.059  | -0.046 | 0.104      | 0.038 | 0.006   |
| 3     | 2     | 0.059  | 0.011  | 0.048      | 0.035 | 0.170   |

Approximate Measurement Invariance Holds For Groups:

0 1 2 3

Weighted Average Value Across Invariant Groups: -0.016

R-square/Explained variance/Invariance index: 0.710

Invariant Group Values, Difference to Average and Significance

| Group | Value  | Difference | SE    | P-value |
|-------|--------|------------|-------|---------|
| 0     | -0.069 | -0.053     | 0.020 | 0.009   |
| 1     | -0.046 | -0.029     | 0.019 | 0.123   |
| 2     | 0.011  | 0.027      | 0.020 | 0.182   |
| 3     | 0.059  | 0.075      | 0.026 | 0.004   |

Intercept for CNP\_PVOC

| Group | Group | Value  | Value  | Difference | SE    | P-value |
|-------|-------|--------|--------|------------|-------|---------|
| 1     | 0     | -0.034 | -0.027 | -0.007     | 0.021 | 0.740   |
| 2     | 0     | -0.030 | -0.027 | -0.003     | 0.016 | 0.868   |
| 2     | 1     | -0.030 | -0.034 | 0.004      | 0.018 | 0.803   |
| 3     | 0     | -0.029 | -0.027 | -0.002     | 0.012 | 0.857   |
| 3     | 1     | -0.029 | -0.034 | 0.005      | 0.014 | 0.723   |
| 3     | 2     | -0.029 | -0.030 | 0.000      | 0.016 | 0.977   |

Approximate Measurement Invariance Holds For Groups:

0 1 2 3

Weighted Average Value Across Invariant Groups: -0.030

R-square/Explained variance/Invariance index: 0.994

Invariant Group Values, Difference to Average and Significance

| Group | Value  | Difference | SE    | P-value |
|-------|--------|------------|-------|---------|
| 0     | -0.027 | 0.003      | 0.010 | 0.777   |
| 1     | -0.034 | -0.004     | 0.012 | 0.730   |
| 2     | -0.030 | 0.000      | 0.010 | 0.977   |
| 3     | -0.029 | 0.001      | 0.007 | 0.914   |

Intercept for NP\_WAIS4

| Group                                                    | Group | Value | Value | Difference | SE | P-value |
|----------------------------------------------------------|-------|-------|-------|------------|----|---------|
| Approximate Invariance Was Not Found For This Parameter. |       |       |       |            |    |         |

Intercept for NP\_GPEG\_

| Group | Group | Value  | Value  | Difference | SE    | P-value |
|-------|-------|--------|--------|------------|-------|---------|
| 1     | 0     | -0.021 | 0.248  | -0.268     | 0.051 | 0.000   |
| 2     | 0     | -0.116 | 0.248  | -0.364     | 0.051 | 0.000   |
| 2     | 1     | -0.116 | -0.021 | -0.095     | 0.046 | 0.040   |
| 3     | 0     | -0.203 | 0.248  | -0.451     | 0.056 | 0.000   |
| 3     | 1     | -0.203 | -0.021 | -0.183     | 0.051 | 0.000   |
| 3     | 2     | -0.203 | -0.116 | -0.087     | 0.051 | 0.087   |

Approximate Measurement Invariance Holds For Groups:

2 3

Weighted Average Value Across Invariant Groups: -0.157

R-square/Explained variance/Invariance index: 0.070

Invariant Group Values, Difference to Average and Significance

| Group | Value  | Difference | SE    | P-value |
|-------|--------|------------|-------|---------|
| 2     | -0.116 | 0.041      | 0.024 | 0.087   |
| 3     | -0.203 | -0.046     | 0.027 | 0.087   |

Intercept for CNP\_SPCP

| Group | Group | Value | Value  | Difference | SE    | P-value |
|-------|-------|-------|--------|------------|-------|---------|
| 1     | 0     | 0.001 | -0.198 | 0.199      | 0.092 | 0.031   |
| 2     | 0     | 0.137 | -0.198 | 0.335      | 0.061 | 0.000   |
| 2     | 1     | 0.137 | 0.001  | 0.136      | 0.061 | 0.026   |
| 3     | 0     | 0.128 | -0.198 | 0.325      | 0.063 | 0.000   |
| 3     | 1     | 0.128 | 0.001  | 0.126      | 0.071 | 0.075   |
| 3     | 2     | 0.128 | 0.137  | -0.009     | 0.040 | 0.814   |

Approximate Measurement Invariance Holds For Groups:

0 1

Weighted Average Value Across Invariant Groups: -0.103

R-square/Explained variance/Invariance index: 0.209

Invariant Group Values, Difference to Average and Significance

| Group | Value  | Difference | SE    | P-value |
|-------|--------|------------|-------|---------|
| 0     | -0.198 | -0.095     | 0.044 | 0.031   |
| 1     | 0.001  | 0.104      | 0.048 | 0.031   |

Intercept for CNP\_PCET

| Group                                                    | Group | Value | Value | Difference | SE | P-value |
|----------------------------------------------------------|-------|-------|-------|------------|----|---------|
| Approximate Invariance Was Not Found For This Parameter. |       |       |       |            |    |         |

Intercept for MEANSVT

| Group | Group | Value | Value | Difference | SE    | P-value |
|-------|-------|-------|-------|------------|-------|---------|
| 1     | 0     | 0.017 | 0.017 | 0.000      | 0.014 | 0.978   |
| 2     | 0     | 0.027 | 0.017 | 0.010      | 0.014 | 0.468   |
| 2     | 1     | 0.027 | 0.017 | 0.010      | 0.016 | 0.532   |
| 3     | 0     | 0.007 | 0.017 | -0.009     | 0.011 | 0.389   |
| 3     | 1     | 0.007 | 0.017 | -0.010     | 0.012 | 0.426   |
| 3     | 2     | 0.007 | 0.027 | -0.019     | 0.018 | 0.282   |

Approximate Measurement Invariance Holds For Groups:

0 1 2 3

Weighted Average Value Across Invariant Groups: 0.017

R-square/Explained variance/Invariance index: 0.975

Invariant Group Values, Difference to Average and Significance

| Group | Value | Difference | SE    | P-value |
|-------|-------|------------|-------|---------|
| 0     | 0.017 | -0.001     | 0.007 | 0.940   |
| 1     | 0.017 | 0.000      | 0.008 | 0.986   |
| 2     | 0.027 | 0.010      | 0.011 | 0.368   |
| 3     | 0.007 | -0.010     | 0.009 | 0.257   |

Intercept for MEANFC

| Group                                                    | Group | Value | Value | Difference | SE | P-value |
|----------------------------------------------------------|-------|-------|-------|------------|----|---------|
| Approximate Invariance Was Not Found For This Parameter. |       |       |       |            |    |         |

Loadings

Loadings for CNP\_SF2B

| Group | Group | Value | Value | Difference | SE    | P-value |
|-------|-------|-------|-------|------------|-------|---------|
| 1     | 0     | 0.507 | 0.493 | 0.015      | 0.031 | 0.638   |
| 2     | 0     | 0.502 | 0.493 | 0.009      | 0.023 | 0.694   |
| 2     | 1     | 0.502 | 0.507 | -0.006     | 0.029 | 0.844   |
| 3     | 0     | 0.488 | 0.493 | -0.005     | 0.017 | 0.780   |
| 3     | 1     | 0.488 | 0.507 | -0.020     | 0.022 | 0.366   |
| 3     | 2     | 0.488 | 0.502 | -0.014     | 0.023 | 0.547   |

Approximate Measurement Invariance Holds For Groups:

0 1 2 3

Weighted Average Value Across Invariant Groups: 0.498

R-square/Explained variance/Invariance index: 0.990

Invariant Group Values, Difference to Average and Significance

| Group | Value | Difference | SE    | P-value |
|-------|-------|------------|-------|---------|
| 0     | 0.493 | -0.005     | 0.015 | 0.733   |
| 1     | 0.507 | 0.010      | 0.019 | 0.601   |
| 2     | 0.502 | 0.004      | 0.016 | 0.796   |
| 3     | 0.488 | -0.010     | 0.010 | 0.327   |

Loadings for CNP\_SPCP

| Group | Group | Value | Value | Difference | SE    | P-value |
|-------|-------|-------|-------|------------|-------|---------|
| 1     | 0     | 0.438 | 0.558 | -0.120     | 0.084 | 0.155   |
| 2     | 0     | 0.274 | 0.558 | -0.284     | 0.069 | 0.000   |
| 2     | 1     | 0.274 | 0.438 | -0.164     | 0.079 | 0.038   |
| 3     | 0     | 0.258 | 0.558 | -0.299     | 0.070 | 0.000   |
| 3     | 1     | 0.258 | 0.438 | -0.180     | 0.080 | 0.025   |
| 3     | 2     | 0.258 | 0.274 | -0.016     | 0.061 | 0.797   |

Approximate Measurement Invariance Holds For Groups:

1 2 3

Weighted Average Value Across Invariant Groups: 0.329

R-square/Explained variance/Invariance index: 0.209

Invariant Group Values, Difference to Average and Significance

| Group | Value | Difference | SE    | P-value |
|-------|-------|------------|-------|---------|
| 1     | 0.438 | 0.109      | 0.047 | 0.020   |
| 2     | 0.274 | -0.055     | 0.039 | 0.161   |
| 3     | 0.258 | -0.071     | 0.042 | 0.091   |

Loadings for CNP\_PCET

| Group | Group | Value | Value | Difference | SE    | P-value |
|-------|-------|-------|-------|------------|-------|---------|
| 1     | 0     | 0.456 | 0.447 | 0.009      | 0.058 | 0.880   |
| 2     | 0     | 0.485 | 0.447 | 0.038      | 0.067 | 0.569   |
| 2     | 1     | 0.485 | 0.456 | 0.029      | 0.070 | 0.676   |
| 3     | 0     | 0.627 | 0.447 | 0.180      | 0.091 | 0.049   |
| 3     | 1     | 0.627 | 0.456 | 0.171      | 0.094 | 0.069   |
| 3     | 2     | 0.627 | 0.485 | 0.142      | 0.091 | 0.119   |

Approximate Measurement Invariance Holds For Groups:

0 1 2 3

Weighted Average Value Across Invariant Groups: 0.497

R-square/Explained variance/Invariance index: 0.646

Invariant Group Values, Difference to Average and Significance

| Group | Value | Difference | SE    | P-value |
|-------|-------|------------|-------|---------|
| 0     | 0.447 | -0.050     | 0.038 | 0.187   |
| 1     | 0.456 | -0.041     | 0.042 | 0.321   |
| 2     | 0.485 | -0.012     | 0.045 | 0.789   |
| 3     | 0.627 | 0.130      | 0.066 | 0.050   |

Loadings

Loadings for CNP\_CPW\_

| Group | Group | Value | Value | Difference | SE    | P-value |
|-------|-------|-------|-------|------------|-------|---------|
| 1     | 0     | 0.528 | 0.512 | 0.017      | 0.038 | 0.661   |
| 2     | 0     | 0.545 | 0.512 | 0.033      | 0.040 | 0.413   |
| 2     | 1     | 0.545 | 0.528 | 0.017      | 0.039 | 0.668   |
| 3     | 0     | 0.516 | 0.512 | 0.005      | 0.036 | 0.899   |
| 3     | 1     | 0.516 | 0.528 | -0.012     | 0.036 | 0.742   |
| 3     | 2     | 0.516 | 0.545 | -0.028     | 0.038 | 0.454   |

Approximate Measurement Invariance Holds For Groups:

0 1 2 3

Weighted Average Value Across Invariant Groups: 0.525

R-square/Explained variance/Invariance index: 0.927

Invariant Group Values, Difference to Average and Significance

| Group | Value | Difference | SE    | P-value |
|-------|-------|------------|-------|---------|
| 0     | 0.512 | -0.013     | 0.023 | 0.556   |
| 1     | 0.528 | 0.003      | 0.023 | 0.885   |
| 2     | 0.545 | 0.020      | 0.025 | 0.427   |
| 3     | 0.516 | -0.009     | 0.023 | 0.705   |

Loadings for MEANSVT

| Group | Group | Value | Value | Difference | SE    | P-value |
|-------|-------|-------|-------|------------|-------|---------|
| 1     | 0     | 0.576 | 0.552 | 0.024      | 0.041 | 0.557   |
| 2     | 0     | 0.573 | 0.552 | 0.021      | 0.035 | 0.551   |
| 2     | 1     | 0.573 | 0.576 | -0.003     | 0.034 | 0.926   |
| 3     | 0     | 0.569 | 0.552 | 0.017      | 0.038 | 0.660   |
| 3     | 1     | 0.569 | 0.576 | -0.007     | 0.035 | 0.831   |
| 3     | 2     | 0.569 | 0.573 | -0.004     | 0.029 | 0.884   |

Approximate Measurement Invariance Holds For Groups:

0 1 2 3

Weighted Average Value Across Invariant Groups: 0.567

R-square/Explained variance/Invariance index: 0.973

Invariant Group Values, Difference to Average and Significance

| Group | Value | Difference | SE    | P-value |
|-------|-------|------------|-------|---------|
| 0     | 0.552 | -0.015     | 0.024 | 0.529   |
| 1     | 0.576 | 0.009      | 0.023 | 0.693   |
| 2     | 0.573 | 0.006      | 0.019 | 0.751   |
| 3     | 0.569 | 0.002      | 0.021 | 0.934   |

Loadings for MEANFC

| Group | Group | Value | Value | Difference | SE    | P-value |
|-------|-------|-------|-------|------------|-------|---------|
| 1     | 0     | 0.539 | 0.644 | -0.105     | 0.061 | 0.082   |
| 2     | 0     | 0.499 | 0.644 | -0.145     | 0.057 | 0.011   |
| 2     | 1     | 0.499 | 0.539 | -0.040     | 0.051 | 0.430   |
| 3     | 0     | 0.596 | 0.644 | -0.048     | 0.056 | 0.389   |
| 3     | 1     | 0.596 | 0.539 | 0.057      | 0.052 | 0.267   |
| 3     | 2     | 0.596 | 0.499 | 0.097      | 0.049 | 0.049   |

Approximate Measurement Invariance Holds For Groups:

0 1 2 3

Weighted Average Value Across Invariant Groups: 0.572

R-square/Explained variance/Invariance index: 0.406

Invariant Group Values, Difference to Average and Significance

| Group | Value | Difference | SE    | P-value |
|-------|-------|------------|-------|---------|
| 0     | 0.644 | 0.073      | 0.036 | 0.042   |
| 1     | 0.539 | -0.032     | 0.033 | 0.330   |
| 2     | 0.499 | -0.072     | 0.031 | 0.021   |
| 3     | 0.596 | 0.025      | 0.032 | 0.444   |

Loadings

Loadings for CNP\_PVRT

| Group | Group | Value | Value | Difference | SE    | P-value |
|-------|-------|-------|-------|------------|-------|---------|
| 1     | 0     | 0.778 | 0.781 | -0.003     | 0.034 | 0.920   |
| 2     | 0     | 0.766 | 0.781 | -0.015     | 0.033 | 0.647   |
| 2     | 1     | 0.766 | 0.778 | -0.012     | 0.034 | 0.725   |
| 3     | 0     | 0.734 | 0.781 | -0.048     | 0.037 | 0.196   |
| 3     | 1     | 0.734 | 0.778 | -0.044     | 0.037 | 0.236   |
| 3     | 2     | 0.734 | 0.766 | -0.032     | 0.037 | 0.382   |

Approximate Measurement Invariance Holds For Groups:

0 1 2 3

Weighted Average Value Across Invariant Groups: 0.766

R-square/Explained variance/Invariance index: 0.385

Invariant Group Values, Difference to Average and Significance

| Group | Value | Difference | SE    | P-value |
|-------|-------|------------|-------|---------|
| 0     | 0.781 | 0.015      | 0.020 | 0.453   |
| 1     | 0.778 | 0.011      | 0.021 | 0.582   |
| 2     | 0.766 | 0.000      | 0.021 | 0.985   |
| 3     | 0.734 | -0.033     | 0.025 | 0.187   |

Loadings for CNP\_PMAT

| Group | Group | Value | Value | Difference | SE    | P-value |
|-------|-------|-------|-------|------------|-------|---------|
| 1     | 0     | 0.628 | 0.625 | 0.003      | 0.030 | 0.919   |
| 2     | 0     | 0.638 | 0.625 | 0.013      | 0.029 | 0.648   |
| 2     | 1     | 0.638 | 0.628 | 0.010      | 0.029 | 0.725   |
| 3     | 0     | 0.662 | 0.625 | 0.038      | 0.028 | 0.174   |
| 3     | 1     | 0.662 | 0.628 | 0.035      | 0.028 | 0.213   |
| 3     | 2     | 0.662 | 0.638 | 0.024      | 0.027 | 0.356   |

Approximate Measurement Invariance Holds For Groups:

0 1 2 3

Weighted Average Value Across Invariant Groups: 0.637

R-square/Explained variance/Invariance index: 0.695

Invariant Group Values, Difference to Average and Significance

| Group | Value | Difference | SE    | P-value |
|-------|-------|------------|-------|---------|
| 0     | 0.625 | -0.012     | 0.017 | 0.484   |
| 1     | 0.628 | -0.009     | 0.018 | 0.613   |
| 2     | 0.638 | 0.001      | 0.017 | 0.950   |
| 3     | 0.662 | 0.026      | 0.017 | 0.131   |

Loadings

Loadings for CNP\_MEDF

| Group | Group | Value | Value | Difference | SE    | P-value |
|-------|-------|-------|-------|------------|-------|---------|
| 1     | 0     | 0.399 | 0.407 | -0.008     | 0.039 | 0.830   |
| 2     | 0     | 0.424 | 0.407 | 0.016      | 0.022 | 0.461   |
| 2     | 1     | 0.424 | 0.399 | 0.025      | 0.033 | 0.450   |

|   |   |       |       |        |       |       |
|---|---|-------|-------|--------|-------|-------|
| 3 | 0 | 0.353 | 0.407 | -0.054 | 0.070 | 0.440 |
| 3 | 1 | 0.353 | 0.399 | -0.046 | 0.071 | 0.519 |
| 3 | 2 | 0.353 | 0.424 | -0.070 | 0.080 | 0.377 |

Approximate Measurement Invariance Holds For Groups:

0 1 2 3

Weighted Average Value Across Invariant Groups: 0.398

R-square/Explained variance/Invariance index: 0.549

Invariant Group Values, Difference to Average and Significance

| Group | Value | Difference | SE    | P-value |
|-------|-------|------------|-------|---------|
| 0     | 0.407 | 0.010      | 0.021 | 0.641   |
| 1     | 0.399 | 0.001      | 0.026 | 0.954   |
| 2     | 0.424 | 0.026      | 0.026 | 0.308   |
| 3     | 0.353 | -0.044     | 0.056 | 0.428   |

Loadings for CNP\_ER40

| Group | Group | Value | Value | Difference | SE    | P-value |
|-------|-------|-------|-------|------------|-------|---------|
| 1     | 0     | 0.283 | 0.275 | 0.007      | 0.036 | 0.836   |
| 2     | 0     | 0.217 | 0.275 | -0.058     | 0.065 | 0.369   |
| 2     | 1     | 0.217 | 0.283 | -0.066     | 0.062 | 0.290   |
| 3     | 0     | 0.305 | 0.275 | 0.029      | 0.029 | 0.312   |
| 3     | 1     | 0.305 | 0.283 | 0.022      | 0.017 | 0.197   |
| 3     | 2     | 0.305 | 0.217 | 0.088      | 0.071 | 0.220   |

Approximate Measurement Invariance Holds For Groups:

0 1 2 3

Weighted Average Value Across Invariant Groups: 0.270

R-square/Explained variance/Invariance index: 0.741

Invariant Group Values, Difference to Average and Significance

| Group | Value | Difference | SE    | P-value |
|-------|-------|------------|-------|---------|
| 0     | 0.275 | 0.006      | 0.024 | 0.808   |
| 1     | 0.283 | 0.013      | 0.020 | 0.508   |
| 2     | 0.217 | -0.052     | 0.048 | 0.278   |
| 3     | 0.305 | 0.035      | 0.024 | 0.146   |

Loadings

Loadings for NP\_WRAT4

| Group | Group | Value | Value | Difference | SE    | P-value |
|-------|-------|-------|-------|------------|-------|---------|
| 1     | 0     | 0.762 | 0.705 | 0.057      | 0.039 | 0.144   |
| 2     | 0     | 0.770 | 0.705 | 0.065      | 0.040 | 0.102   |
| 2     | 1     | 0.770 | 0.762 | 0.008      | 0.030 | 0.796   |
| 3     | 0     | 0.745 | 0.705 | 0.040      | 0.037 | 0.287   |
| 3     | 1     | 0.745 | 0.762 | -0.017     | 0.030 | 0.564   |
| 3     | 2     | 0.745 | 0.770 | -0.025     | 0.034 | 0.452   |

Approximate Measurement Invariance Holds For Groups:

0 1 2 3

Weighted Average Value Across Invariant Groups: 0.744

R-square/Explained variance/Invariance index: 0.000

Invariant Group Values, Difference to Average and Significance

| Group | Value | Difference | SE    | P-value |
|-------|-------|------------|-------|---------|
| 0     | 0.705 | -0.039     | 0.025 | 0.113   |
| 1     | 0.762 | 0.018      | 0.019 | 0.351   |
| 2     | 0.770 | 0.026      | 0.021 | 0.224   |
| 3     | 0.745 | 0.001      | 0.021 | 0.975   |

Loadings for NP\_WRAT4

| Group | Group | Value | Value | Difference | SE    | P-value |
|-------|-------|-------|-------|------------|-------|---------|
| 1     | 0     | 0.829 | 0.887 | -0.058     | 0.039 | 0.136   |
| 2     | 0     | 0.769 | 0.887 | -0.118     | 0.040 | 0.003   |
| 2     | 1     | 0.769 | 0.829 | -0.060     | 0.038 | 0.112   |

|   |   |       |       |        |       |       |
|---|---|-------|-------|--------|-------|-------|
| 3 | 0 | 0.777 | 0.887 | -0.110 | 0.041 | 0.007 |
| 3 | 1 | 0.777 | 0.829 | -0.053 | 0.038 | 0.162 |
| 3 | 2 | 0.777 | 0.769 | 0.008  | 0.034 | 0.827 |

Approximate Measurement Invariance Holds For Groups:

0 1 2 3

Weighted Average Value Across Invariant Groups: 0.820

R-square/Explained variance/Invariance index: 0.282

Invariant Group Values, Difference to Average and Significance

| Group | Value | Difference | SE    | P-value |
|-------|-------|------------|-------|---------|
| 0     | 0.887 | 0.067      | 0.024 | 0.005   |
| 1     | 0.829 | 0.009      | 0.023 | 0.679   |
| 2     | 0.769 | -0.051     | 0.023 | 0.028   |
| 3     | 0.777 | -0.043     | 0.024 | 0.070   |

Loadings for CNP\_PVOC

| Group | Group | Value | Value | Difference | SE    | P-value |
|-------|-------|-------|-------|------------|-------|---------|
| 1     | 0     | 0.751 | 0.768 | -0.017     | 0.025 | 0.497   |
| 2     | 0     | 0.782 | 0.768 | 0.013      | 0.021 | 0.528   |
| 2     | 1     | 0.782 | 0.751 | 0.031      | 0.032 | 0.340   |
| 3     | 0     | 0.803 | 0.768 | 0.035      | 0.027 | 0.207   |
| 3     | 1     | 0.803 | 0.751 | 0.052      | 0.036 | 0.149   |
| 3     | 2     | 0.803 | 0.782 | 0.021      | 0.031 | 0.501   |

Approximate Measurement Invariance Holds For Groups:

0 1 2 3

Weighted Average Value Across Invariant Groups: 0.774

R-square/Explained variance/Invariance index: 0.547

Invariant Group Values, Difference to Average and Significance

| Group | Value | Difference | SE    | P-value |
|-------|-------|------------|-------|---------|
| 0     | 0.768 | -0.006     | 0.011 | 0.582   |
| 1     | 0.751 | -0.023     | 0.020 | 0.239   |
| 2     | 0.782 | 0.007      | 0.017 | 0.674   |
| 3     | 0.803 | 0.028      | 0.022 | 0.192   |

Loadings

Loadings for NP\_WAIS4

| Group | Group | Value | Value  | Difference | SE    | P-value |
|-------|-------|-------|--------|------------|-------|---------|
| 1     | 0     | 2.538 | -0.837 | 3.375      | 0.538 | 0.000   |
| 2     | 0     | 2.743 | -0.837 | 3.580      | 0.375 | 0.000   |
| 2     | 1     | 2.743 | 2.538  | 0.205      | 0.181 | 0.256   |
| 3     | 0     | 2.692 | -0.837 | 3.529      | 0.457 | 0.000   |
| 3     | 1     | 2.692 | 2.538  | 0.154      | 0.221 | 0.486   |
| 3     | 2     | 2.692 | 2.743  | -0.051     | 0.216 | 0.812   |

Approximate Measurement Invariance Holds For Groups:

1 2 3

Weighted Average Value Across Invariant Groups: 2.653

R-square/Explained variance/Invariance index: 0.000

Invariant Group Values, Difference to Average and Significance

| Group | Value | Difference | SE    | P-value |
|-------|-------|------------|-------|---------|
| 1     | 2.538 | -0.115     | 0.108 | 0.284   |
| 2     | 2.743 | 0.090      | 0.109 | 0.408   |
| 3     | 2.692 | 0.039      | 0.139 | 0.782   |

Loadings for NP\_GPEG\_

| Group | Group | Value  | Value  | Difference | SE    | P-value |
|-------|-------|--------|--------|------------|-------|---------|
| 1     | 0     | -1.473 | 0.614  | -2.086     | 0.196 | 0.000   |
| 2     | 0     | -1.337 | 0.614  | -1.951     | 0.332 | 0.000   |
| 2     | 1     | -1.337 | -1.473 | 0.136      | 0.155 | 0.383   |
| 3     | 0     | -1.378 | 0.614  | -1.991     | 0.278 | 0.000   |



|   |   |        |        |        |       |       |
|---|---|--------|--------|--------|-------|-------|
| 3 | 1 | -1.378 | -1.473 | 0.095  | 0.143 | 0.507 |
| 3 | 2 | -1.378 | -1.337 | -0.040 | 0.178 | 0.820 |

Approximate Measurement Invariance Holds For Groups:

1 2 3

Weighted Average Value Across Invariant Groups: -1.399

R-square/Explained variance/Invariance index: 0.000

Invariant Group Values, Difference to Average and Significance

| Group | Value  | Difference | SE    | P-value |
|-------|--------|------------|-------|---------|
| 1     | -1.473 | -0.074     | 0.077 | 0.335   |
| 2     | -1.337 | 0.061      | 0.099 | 0.536   |
| 3     | -1.378 | 0.021      | 0.098 | 0.832   |

Average Invariance index: 0.483

### GUR+ Model: Invariance by Sex Sex (0: Female; 1: Male)

APPROXIMATE MEASUREMENT INVARIANCE (NONINVARIANCE) FOR GROUPS

Intercepts/Thresholds

|          |     |     |
|----------|-----|-----|
| CNP_SF2B | 0   | 1   |
| CNP_CPW_ | 0   | 1   |
| CNP_PVRT | (0) | (1) |
| CNP_PMAT | 0   | 1   |
| CNP_MEDF | 0   | 1   |
| CNP_ER40 | 0   | 1   |
| NP_WRAT4 | (0) | (1) |
| NP_WRAT4 | 0   | 1   |
| CNP_PVOC | 0   | 1   |
| NP_WAIS4 | (0) | (1) |
| NP_GPEG_ | 0   | 1   |
| CNP_SPCP | 0   | 1   |
| CNP_PCET | (0) | (1) |
| MEANSVT  | 0   | 1   |
| MEANFC   | (0) | (1) |

Loadings for EXFUNC

|          |   |   |
|----------|---|---|
| CNP_SF2B | 0 | 1 |
| CNP_SPCP | 0 | 1 |
| CNP_PCET | 0 | 1 |

Loadings for EPISMEM

|          |   |   |
|----------|---|---|
| CNP_CPW_ | 0 | 1 |
| MEANSVT  | 0 | 1 |
| MEANFC   | 0 | 1 |

Loadings for CMPLXCOG

|          |   |   |
|----------|---|---|
| CNP_PVRT | 0 | 1 |
| CNP_PMAT | 0 | 1 |

Loadings for SOCCOG

|          |   |   |
|----------|---|---|
| CNP_MEDF | 0 | 1 |
| CNP_ER40 | 0 | 1 |

Loadings for GENAB

|          |   |   |
|----------|---|---|
| NP_WRAT4 | 0 | 1 |
| NP_WRAT4 | 0 | 1 |
| CNP_PVOC | 0 | 1 |

Loadings for MOTORSP

|          |     |     |
|----------|-----|-----|
| NP_WAIS4 | (0) | (1) |
|----------|-----|-----|

NP\_GPEG\_ (0) (1)

FACTOR MEAN COMPARISON AT THE 5% SIGNIFICANCE LEVEL IN DESCENDING ORDER

Results for Factor EXFUNC

| Ranking | Latent Class | Group Value | Factor Mean | Groups With Significantly Smaller Factor Mean |
|---------|--------------|-------------|-------------|-----------------------------------------------|
| 1       | 2            | 1           | 0.041       |                                               |
| 2       | 1            | 0           | 0.000       |                                               |

Results for Factor EPISMEM

| Ranking | Latent Class | Group Value | Factor Mean | Groups With Significantly Smaller Factor Mean |
|---------|--------------|-------------|-------------|-----------------------------------------------|
| 1       | 2            | 1           | 0.019       |                                               |
| 2       | 1            | 0           | 0.000       |                                               |

Results for Factor CMPLXCOG

| Ranking | Latent Class | Group Value | Factor Mean | Groups With Significantly Smaller Factor Mean |
|---------|--------------|-------------|-------------|-----------------------------------------------|
| 1       | 2            | 1           | 0.110       |                                               |
| 2       | 1            | 0           | 0.000       |                                               |

Results for Factor SOCCOG

| Ranking | Latent Class | Group Value | Factor Mean | Groups With Significantly Smaller Factor Mean |
|---------|--------------|-------------|-------------|-----------------------------------------------|
| 1       | 1            | 0           | 0.000       |                                               |
| 2       | 2            | 1           | -0.269      |                                               |

Results for Factor GENAB

| Ranking | Latent Class | Group Value | Factor Mean | Groups With Significantly Smaller Factor Mean |
|---------|--------------|-------------|-------------|-----------------------------------------------|
| 1       | 2            | 1           | 0.146       | 0                                             |
| 2       | 1            | 0           | 0.000       |                                               |

Results for Factor MOTORSP

| Ranking | Latent Class | Group Value | Factor Mean | Groups With Significantly Smaller Factor Mean |
|---------|--------------|-------------|-------------|-----------------------------------------------|
| 1       | 1            | 0           | 0.000       |                                               |
| 2       | 2            | 1           | -0.030      |                                               |

ALIGNMENT OUTPUT

INVARIANCE ANALYSIS

Intercepts/Thresholds

Intercept for CNP\_SF2B

| Group | Group | Value  | Value  | Difference | SE    | P-value |
|-------|-------|--------|--------|------------|-------|---------|
| 1     | 0     | -0.025 | -0.130 | 0.105      | 0.088 | 0.230   |

Approximate Measurement Invariance Holds For Groups:

0 1

Weighted Average Value Across Invariant Groups: -0.079

R-square/Explained variance/Invariance index: 0.294

Invariant Group Values, Difference to Average and Significance

| Group | Value  | Difference | SE    | P-value |
|-------|--------|------------|-------|---------|
| 0     | -0.130 | -0.052     | 0.043 | 0.230   |

1 -0.025 0.054 0.045 0.230

Intercept for CNP\_CPW

| Group | Group | Value | Value | Difference | SE    | P-value |
|-------|-------|-------|-------|------------|-------|---------|
| 1     | 0     | 0.041 | 0.280 | -0.240     | 0.076 | 0.002   |

Approximate Measurement Invariance Holds For Groups:

0 1

Weighted Average Value Across Invariant Groups: 0.163

R-square/Explained variance/Invariance index: 0.000

Invariant Group Values, Difference to Average and Significance

| Group | Value | Difference | SE    | P-value |
|-------|-------|------------|-------|---------|
| 0     | 0.280 | 0.118      | 0.037 | 0.002   |
| 1     | 0.041 | -0.122     | 0.038 | 0.002   |

Intercept for CNP\_PVRT

| Group | Group | Value | Value | Difference | SE | P-value |
|-------|-------|-------|-------|------------|----|---------|
|-------|-------|-------|-------|------------|----|---------|

Approximate Invariance Was Not Found For This Parameter.

Intercept for CNP\_PMAT

| Group | Group | Value  | Value  | Difference | SE    | P-value |
|-------|-------|--------|--------|------------|-------|---------|
| 1     | 0     | -0.035 | -0.138 | 0.102      | 0.135 | 0.447   |

Approximate Measurement Invariance Holds For Groups:

0 1

Weighted Average Value Across Invariant Groups: -0.088

R-square/Explained variance/Invariance index: 0.655

Invariant Group Values, Difference to Average and Significance

| Group | Value  | Difference | SE    | P-value |
|-------|--------|------------|-------|---------|
| 0     | -0.138 | -0.050     | 0.066 | 0.447   |
| 1     | -0.035 | 0.052      | 0.068 | 0.447   |

Intercept for CNP\_MEDF

| Group | Group | Value | Value | Difference | SE    | P-value |
|-------|-------|-------|-------|------------|-------|---------|
| 1     | 0     | 0.128 | 0.108 | 0.020      | 0.019 | 0.291   |

Approximate Measurement Invariance Holds For Groups:

0 1

Weighted Average Value Across Invariant Groups: 0.118

R-square/Explained variance/Invariance index: 1.000

Invariant Group Values, Difference to Average and Significance

| Group | Value | Difference | SE    | P-value |
|-------|-------|------------|-------|---------|
| 0     | 0.108 | -0.010     | 0.010 | 0.291   |
| 1     | 0.128 | 0.010      | 0.010 | 0.291   |

Intercept for CNP\_ER40

| Group | Group | Value  | Value  | Difference | SE    | P-value |
|-------|-------|--------|--------|------------|-------|---------|
| 1     | 0     | -0.239 | -0.159 | -0.080     | 0.106 | 0.447   |

Approximate Measurement Invariance Holds For Groups:

0 1

Weighted Average Value Across Invariant Groups: -0.198

R-square/Explained variance/Invariance index: 0.740

Invariant Group Values, Difference to Average and Significance

| Group | Value  | Difference | SE    | P-value |
|-------|--------|------------|-------|---------|
| 0     | -0.159 | 0.039      | 0.052 | 0.447   |
| 1     | -0.239 | -0.041     | 0.054 | 0.447   |

Intercept for NP\_WRAT4

| Group | Group | Value | Value | Difference | SE | P-value |
|-------|-------|-------|-------|------------|----|---------|
|-------|-------|-------|-------|------------|----|---------|

Approximate Invariance Was Not Found For This Parameter.

Intercept for NP\_WRAT4

| Group | Group | Value  | Value  | Difference | SE    | P-value |
|-------|-------|--------|--------|------------|-------|---------|
| 1     | 0     | -0.106 | -0.138 | 0.032      | 0.038 | 0.400   |

Approximate Measurement Invariance Holds For Groups:

0 1

Weighted Average Value Across Invariant Groups: -0.123

R-square/Explained variance/Invariance index: 0.954

Invariant Group Values, Difference to Average and Significance

| Group | Value  | Difference | SE    | P-value |
|-------|--------|------------|-------|---------|
| 0     | -0.138 | -0.016     | 0.018 | 0.400   |
| 1     | -0.106 | 0.016      | 0.019 | 0.400   |

Intercept for CNP\_PVOC

| Group | Group | Value  | Value  | Difference | SE    | P-value |
|-------|-------|--------|--------|------------|-------|---------|
| 1     | 0     | -0.065 | -0.082 | 0.016      | 0.028 | 0.557   |

Approximate Measurement Invariance Holds For Groups:

0 1

Weighted Average Value Across Invariant Groups: -0.074

R-square/Explained variance/Invariance index: 0.980

Invariant Group Values, Difference to Average and Significance

| Group | Value  | Difference | SE    | P-value |
|-------|--------|------------|-------|---------|
| 0     | -0.082 | -0.008     | 0.014 | 0.557   |
| 1     | -0.065 | 0.008      | 0.014 | 0.557   |

Intercept for NP\_WAIS4

| Group | Group | Value  | Value  | Difference | SE    | P-value |
|-------|-------|--------|--------|------------|-------|---------|
| 1     | 0     | -0.065 | -0.082 | 0.016      | 0.028 | 0.557   |

Approximate Invariance Was Not Found For This Parameter.

Intercept for NP\_GPEG\_

| Group | Group | Value | Value | Difference | SE    | P-value |
|-------|-------|-------|-------|------------|-------|---------|
| 1     | 0     | 0.259 | 0.239 | 0.020      | 0.043 | 0.645   |

Approximate Measurement Invariance Holds For Groups:

0 1

Weighted Average Value Across Invariant Groups: 0.249

R-square/Explained variance/Invariance index: 0.000

Invariant Group Values, Difference to Average and Significance

| Group | Value | Difference | SE    | P-value |
|-------|-------|------------|-------|---------|
| 0     | 0.239 | -0.010     | 0.021 | 0.645   |
| 1     | 0.259 | 0.010      | 0.022 | 0.645   |

Intercept for CNP\_SPCP

| Group | Group | Value  | Value  | Difference | SE    | P-value |
|-------|-------|--------|--------|------------|-------|---------|
| 1     | 0     | -0.215 | -0.192 | -0.022     | 0.035 | 0.518   |

Approximate Measurement Invariance Holds For Groups:

0 1

Weighted Average Value Across Invariant Groups: -0.203

R-square/Explained variance/Invariance index: 0.000

Invariant Group Values, Difference to Average and Significance

| Group | Value  | Difference | SE    | P-value |
|-------|--------|------------|-------|---------|
| 0     | -0.192 | 0.011      | 0.017 | 0.518   |
| 1     | -0.215 | -0.011     | 0.018 | 0.518   |

Intercept for CNP\_PCET

| Group | Group | Value  | Value  | Difference | SE    | P-value |
|-------|-------|--------|--------|------------|-------|---------|
| 1     | 0     | -0.215 | -0.192 | -0.022     | 0.035 | 0.518   |

Approximate Invariance Was Not Found For This Parameter.

Intercept for MEANSVT

| Group | Group | Value | Value  | Difference | SE    | P-value |
|-------|-------|-------|--------|------------|-------|---------|
| 1     | 0     | 0.054 | -0.017 | 0.070      | 0.064 | 0.270   |

Approximate Measurement Invariance Holds For Groups:

0 1

Weighted Average Value Across Invariant Groups: 0.018  
R-square/Explained variance/Invariance index: 0.256

Invariant Group Values, Difference to Average and Significance

| Group | Value  | Difference | SE    | P-value |
|-------|--------|------------|-------|---------|
| 0     | -0.017 | -0.035     | 0.031 | 0.270   |
| 1     | 0.054  | 0.036      | 0.032 | 0.270   |

Intercept for MEANFC

Group Group Value Value Difference SE P-value  
Approximate Invariance Was Not Found For This Parameter.

Loadings

Loadings for CNP\_SF2B

| Group | Group | Value | Value | Difference | SE    | P-value |
|-------|-------|-------|-------|------------|-------|---------|
| 1     | 0     | 0.490 | 0.475 | 0.015      | 0.061 | 0.803   |

Approximate Measurement Invariance Holds For Groups:

0 1

Weighted Average Value Across Invariant Groups: 0.483  
R-square/Explained variance/Invariance index: 0.915

Invariant Group Values, Difference to Average and Significance

| Group | Value | Difference | SE    | P-value |
|-------|-------|------------|-------|---------|
| 0     | 0.475 | -0.007     | 0.030 | 0.803   |
| 1     | 0.490 | 0.008      | 0.031 | 0.803   |

Loadings for CNP\_SPCP

| Group | Group | Value | Value | Difference | SE    | P-value |
|-------|-------|-------|-------|------------|-------|---------|
| 1     | 0     | 0.546 | 0.536 | 0.011      | 0.059 | 0.859   |

Approximate Measurement Invariance Holds For Groups:

0 1

Weighted Average Value Across Invariant Groups: 0.541  
R-square/Explained variance/Invariance index: 0.958

Invariant Group Values, Difference to Average and Significance

| Group | Value | Difference | SE    | P-value |
|-------|-------|------------|-------|---------|
| 0     | 0.536 | -0.005     | 0.029 | 0.859   |
| 1     | 0.546 | 0.005      | 0.030 | 0.859   |

Loadings for CNP\_PCET

| Group | Group | Value | Value | Difference | SE    | P-value |
|-------|-------|-------|-------|------------|-------|---------|
| 1     | 0     | 0.344 | 0.515 | -0.170     | 0.087 | 0.049   |

Approximate Measurement Invariance Holds For Groups:

0 1

Weighted Average Value Across Invariant Groups: 0.431  
R-square/Explained variance/Invariance index: 0.000

Invariant Group Values, Difference to Average and Significance

| Group | Value | Difference | SE    | P-value |
|-------|-------|------------|-------|---------|
| 0     | 0.515 | 0.084      | 0.042 | 0.049   |
| 1     | 0.344 | -0.087     | 0.044 | 0.049   |

Loadings

Loadings for CNP\_CPW\_

| Group | Group | Value | Value | Difference | SE    | P-value |
|-------|-------|-------|-------|------------|-------|---------|
| 1     | 0     | 0.529 | 0.532 | -0.003     | 0.057 | 0.959   |

Approximate Measurement Invariance Holds For Groups:

0 1

Weighted Average Value Across Invariant Groups: 0.531  
R-square/Explained variance/Invariance index: 0.995

Invariant Group Values, Difference to Average and Significance

| Group | Value | Difference | SE    | P-value |
|-------|-------|------------|-------|---------|
| 0     | 0.532 | 0.001      | 0.028 | 0.959   |
| 1     | 0.529 | -0.001     | 0.029 | 0.959   |

Loadings for MEANSVT

| Group | Group | Value | Value | Difference | SE    | P-value |
|-------|-------|-------|-------|------------|-------|---------|
| 1     | 0     | 0.595 | 0.567 | 0.028      | 0.074 | 0.708   |

Approximate Measurement Invariance Holds For Groups:

0 1

Weighted Average Value Across Invariant Groups: 0.580

R-square/Explained variance/Invariance index: 0.000

Invariant Group Values, Difference to Average and Significance

| Group | Value | Difference | SE    | P-value |
|-------|-------|------------|-------|---------|
| 0     | 0.567 | -0.014     | 0.036 | 0.708   |
| 1     | 0.595 | 0.014      | 0.038 | 0.708   |

Loadings for MEANFC

| Group | Group | Value | Value | Difference | SE    | P-value |
|-------|-------|-------|-------|------------|-------|---------|
| 1     | 0     | 0.650 | 0.676 | -0.026     | 0.076 | 0.728   |

Approximate Measurement Invariance Holds For Groups:

0 1

Weighted Average Value Across Invariant Groups: 0.663

R-square/Explained variance/Invariance index: 0.874

Invariant Group Values, Difference to Average and Significance

| Group | Value | Difference | SE    | P-value |
|-------|-------|------------|-------|---------|
| 0     | 0.676 | 0.013      | 0.037 | 0.728   |
| 1     | 0.650 | -0.013     | 0.039 | 0.728   |

Loadings

Loadings for CNP\_PVRT

| Group | Group | Value | Value | Difference | SE    | P-value |
|-------|-------|-------|-------|------------|-------|---------|
| 1     | 0     | 0.815 | 0.809 | 0.006      | 0.053 | 0.914   |

Approximate Measurement Invariance Holds For Groups:

0 1

Weighted Average Value Across Invariant Groups: 0.812

R-square/Explained variance/Invariance index: 0.991

Invariant Group Values, Difference to Average and Significance

| Group | Value | Difference | SE    | P-value |
|-------|-------|------------|-------|---------|
| 0     | 0.809 | -0.003     | 0.026 | 0.914   |
| 1     | 0.815 | 0.003      | 0.027 | 0.914   |

Loadings for CNP\_PMAT

| Group | Group | Value | Value | Difference | SE    | P-value |
|-------|-------|-------|-------|------------|-------|---------|
| 1     | 0     | 0.647 | 0.652 | -0.005     | 0.043 | 0.914   |

Approximate Measurement Invariance Holds For Groups:

0 1

Weighted Average Value Across Invariant Groups: 0.650

R-square/Explained variance/Invariance index: 0.993

Invariant Group Values, Difference to Average and Significance

| Group | Value | Difference | SE    | P-value |
|-------|-------|------------|-------|---------|
| 0     | 0.652 | 0.002      | 0.021 | 0.914   |
| 1     | 0.647 | -0.002     | 0.022 | 0.914   |

Loadings for CNP\_MEDF

| Group | Group | Value | Value | Difference | SE | P-value |
|-------|-------|-------|-------|------------|----|---------|
|-------|-------|-------|-------|------------|----|---------|

|   |   |       |       |       |       |       |
|---|---|-------|-------|-------|-------|-------|
| 1 | 0 | 0.489 | 0.348 | 0.141 | 0.189 | 0.456 |
|---|---|-------|-------|-------|-------|-------|

Approximate Measurement Invariance Holds For Groups:  
0 1  
Weighted Average Value Across Invariant Groups: 0.417  
R-square/Explained variance/Invariance index: 0.000

Invariant Group Values, Difference to Average and Significance

| Group | Value | Difference | SE    | P-value |
|-------|-------|------------|-------|---------|
| 0     | 0.348 | -0.069     | 0.093 | 0.456   |
| 1     | 0.489 | 0.072      | 0.096 | 0.456   |

Loadings for CNP\_ER40

| Group | Group | Value | Value | Difference | SE    | P-value |
|-------|-------|-------|-------|------------|-------|---------|
| 1     | 0     | 0.268 | 0.287 | -0.019     | 0.014 | 0.185   |

Approximate Measurement Invariance Holds For Groups:  
0 1  
Weighted Average Value Across Invariant Groups: 0.277  
R-square/Explained variance/Invariance index: 0.841

Invariant Group Values, Difference to Average and Significance

| Group | Value | Difference | SE    | P-value |
|-------|-------|------------|-------|---------|
| 0     | 0.287 | 0.009      | 0.007 | 0.185   |
| 1     | 0.268 | -0.010     | 0.007 | 0.185   |

Loadings for NP\_WRAT4

| Group | Group | Value | Value | Difference | SE    | P-value |
|-------|-------|-------|-------|------------|-------|---------|
| 1     | 0     | 0.581 | 0.757 | -0.175     | 0.068 | 0.010   |

Approximate Measurement Invariance Holds For Groups:  
0 1  
Weighted Average Value Across Invariant Groups: 0.670  
R-square/Explained variance/Invariance index: 0.000

Invariant Group Values, Difference to Average and Significance

| Group | Value | Difference | SE    | P-value |
|-------|-------|------------|-------|---------|
| 0     | 0.757 | 0.086      | 0.033 | 0.010   |
| 1     | 0.581 | -0.089     | 0.035 | 0.010   |

Loadings for NP\_WRAT4

| Group | Group | Value | Value | Difference | SE    | P-value |
|-------|-------|-------|-------|------------|-------|---------|
| 1     | 0     | 0.857 | 0.829 | 0.028      | 0.040 | 0.477   |

Approximate Measurement Invariance Holds For Groups:  
0 1  
Weighted Average Value Across Invariant Groups: 0.843  
R-square/Explained variance/Invariance index: 0.940

Invariant Group Values, Difference to Average and Significance

| Group | Value | Difference | SE    | P-value |
|-------|-------|------------|-------|---------|
| 0     | 0.829 | -0.014     | 0.020 | 0.477   |
| 1     | 0.857 | 0.014      | 0.020 | 0.477   |

Loadings for CNP\_PVOC

| Group | Group | Value | Value | Difference | SE    | P-value |
|-------|-------|-------|-------|------------|-------|---------|
| 1     | 0     | 0.739 | 0.720 | 0.019      | 0.031 | 0.528   |

Approximate Measurement Invariance Holds For Groups:  
0 1  
Weighted Average Value Across Invariant Groups: 0.729  
R-square/Explained variance/Invariance index: 0.959

Invariant Group Values, Difference to Average and Significance

| Group | Value | Difference | SE    | P-value |
|-------|-------|------------|-------|---------|
| 0     | 0.720 | -0.010     | 0.015 | 0.528   |
| 1     | 0.739 | 0.010      | 0.016 | 0.528   |

Loadings for NP\_WAIS4

| Group | Group | Value | Value  | Difference | SE    | P-value |
|-------|-------|-------|--------|------------|-------|---------|
| 1     | 0     | 0.846 | -0.794 | 1.641      | 0.112 | 0.000   |

Approximate Invariance Was Not Found For This Parameter.

Loadings for NP\_GPEG\_

| Group | Group | Value  | Value | Difference | SE    | P-value |
|-------|-------|--------|-------|------------|-------|---------|
| 1     | 0     | -0.576 | 0.614 | -1.190     | 0.101 | 0.000   |

Approximate Invariance Was Not Found For This Parameter.

Average Invariance index: 0.580
